# Supplementary material for: Clustering symptoms of non-severe malaria in semi-immune Amazonian patients
Source: PeerJ. 2015 Oct 13;3:e1325. doi: 10.7717/peerj.1325 (PMC4614890; doi:10.7717/peerj.1325)
Supplement: Supplemental Information 1 [file peerj-03-1325-s001.xlsx]

## Sheet: Sheet1
DATENTR	DIASSINT	SEXO	resGE1fin	cruz1final	forma1fin	clasParPositivos	ReclasParAdPos	idade	tempoam	idExpMaAd	malant	quantmal	FEV	CHI	SWE	HEA	VOM	NAU	ABD	DIA	ART	DIZ	COU	MYA	intFEB	intCAL	intSUD	intCEF	intNAU	intVOM	intDOR	intDIA	intART	intTONT	intDISP	intTOS	intMIALOMB	intFEB3	intCAL3	intSUD3	intCEF3	intNAU3	intVOM3	intDOR3	intDIA3	intART3	intTONT3	intDISP3	intTOS3
2012-06-07	1	2	1	0.5	99	1	1	20	20	0	1	9	0	0	0	1	0	0	0	0	0	0	1	0	0	0	0	2	0	0	0	0	0	0	0	2	0	0	0	0	2	0	0	0	0	0	0	0	2
2012-02-29	99	2	1	0.25	8	1	1	23	23	0	1	1	1	1	0	1	0	0	0	0	0	0	0	0	1	1	0	1	0	0	0	0	0	0	0	0	0	1	1	0	1	0	0	0	0	0	0	0	0
2012-06-19	14	1	1	0.5	99	1	1	19	19	0	1	6	1	1	0	0	0	0	0	0	0	0	0	0	1	1	0	0	0	0	0	0	0	0	0	0	0	1	1	0	0	0	0	0	0	0	0	0	0
2012-02-29	0	2	1	0.25	5	1	1	31	31	0	1	30	0	0	0	0	0	0	0	0	0	0	0	0	0	0	0	0	0	0	0	0	0	0	0	0	0	0	0	0	0	0	0	0	0	0	0	0	0
2013-06-02	5	1	1	0.25	10	1	1	47	46	1	1	8	1	1	1	1	1	1	0	0	1	1	0	0	1	2	2	2	2	2	0	0	99	2	0	0	0	1	2	2	2	2	2	0	0	99	2	0	0
2012-02-14	2	2	1	0.25	10	1	1	24	24	0	1	20	0	0	0	1	0	1	0	0	0	1	1	1	0	0	0	1	1	0	0	0	0	2	0	2	1	0	0	0	1	1	0	0	0	0	2	0	2
2013-06-05	5	2	1	0.5	99	1	1	23	23	0	1	2	0	0	0	1	0	0	0	0	0	0	0	1	0	0	0	1	0	0	0	0	0	0	0	0	1	0	0	0	1	0	0	0	0	0	0	0	0
2012-11-21	3	1	1	2	99	3	2	14	14	0	1	6	1	1	0	1	0	1	1	0	1	1	0	1	3	2	0	3	2	0	2	0	99	2	0	0	2	3	2	0	3	2	0	2	0	99	2	0	0
2012-06-19	2	2	1	0.25	5	1	1	55	54	1	1	20	1	1	1	1	0	1	0	0	1	0	0	1	1	2	3	3	3	0	0	0	99	0	0	0	2	1	2	3	3	3	0	0	0	99	0	0	0
2012-06-06	1	2	1	1	99	2	2	16	16	0	1	12	1	1	0	1	0	0	0	0	0	1	0	1	1	1	0	2	0	0	0	0	0	1	0	0	3	1	1	0	2	0	0	0	0	0	1	0	0
2012-02-14	5	2	1	0.25	25	1	1	36	35	1	1	1	1	1	1	1	0	0	1	0	0	0	0	1	1	2	2	2	0	0	2	0	0	0	0	0	3	1	2	2	2	0	0	2	0	0	0	0	0
2013-05-15	2	2	1	0.5	99	1	1	10	10	0	1	15	0	1	0	0	0	0	0	0	0	0	0	0	0	2	0	0	0	0	0	0	0	0	0	0	0	0	2	0	0	0	0	0	0	0	0	0	0
2012-11-22	2	1	1	0.25	10	1	1	9	9	0	1	6	1	1	0	1	0	0	1	0	0	0	0	0	1	3	0	2	0	0	1	0	0	0	0	0	0	1	3	0	2	0	0	1	0	0	0	0	0
2012-02-29	2	2	1	0.25	35	1	1	27	27	0	1	2	1	0	1	1	0	1	0	0	0	0	0	0	1	0	1	2	1	0	0	0	0	0	0	0	0	1	0	1	2	1	0	0	0	0	0	0	0
2012-11-01	4	1	1	2	99	3	2	12	12	0	1	3	1	0	0	1	0	1	0	0	0	1	0	0	3	0	0	1	1	0	0	0	0	3	0	0	0	3	0	0	1	1	0	0	0	0	3	0	0
2012-11-22	99	1	1	0.25	10	1	1	26	23	3	1	14	0	1	0	1	0	0	0	0	1	0	0	0	0	2	0	3	0	0	0	0	99	0	0	0	0	0	2	0	3	0	0	0	0	99	0	0	0
2013-05-10	2	2	1	0.25	5	1	1	67	67	0	1	2	1	1	0	1	0	1	0	0	1	0	0	0	3	3	0	1	1	0	0	0	99	0	0	0	0	3	3	0	1	1	0	0	0	99	0	0	0
2013-05-13	3	1	1	0.5	99	1	1	14	14	0	1	13	1	1	1	1	0	0	1	0	0	1	1	0	1	2	2	3	0	0	3	0	0	2	0	2	0	1	2	2	3	0	0	3	0	0	2	0	2
2013-05-16	7	1	1	0.25	30	1	1	30	30	0	1	5	1	0	0	1	0	1	0	0	1	1	0	0	1	0	0	2	2	0	0	0	99	2	0	0	0	1	0	0	2	2	0	0	0	99	2	0	0
2012-06-21	3	2	1	2	99	3	2	17	14	3	0	0	1	1	0	1	1	1	1	0	1	1	1	0	3	2	0	2	3	2	3	0	99	3	0	3	0	3	2	0	2	3	2	3	0	99	3	0	3
2013-05-12	99	2	1	2	99	3	2	12	10	2	1	3	1	1	1	1	0	0	0	0	0	1	1	0	3	3	3	3	0	0	0	0	0	1	0	1	0	3	3	3	3	0	0	0	0	0	1	0	1
2013-05-10	99	2	1	0.25	5	1	1	21	21	0	1	17	0	0	0	0	0	0	0	0	0	0	0	0	0	0	0	0	0	0	0	0	0	0	0	0	0	0	0	0	0	0	0	0	0	0	0	0	0
2012-02-20	3	2	1	2	99	3	2	11	11	0	1	5	1	1	1	1	1	1	0	0	1	1	0	0	3	3	2	2	2	1	0	0	99	2	0	0	0	3	3	2	2	2	1	0	0	99	2	0	0
2012-11-23	2	2	1	0.5	99	1	1	16	16	0	1	1	1	1	1	1	0	0	0	0	0	0	1	0	1	1	3	3	0	0	0	0	0	0	0	1	0	1	1	3	3	0	0	0	0	0	0	0	1
2013-05-12	2	1	1	3	99	3	2	14	14	0	1	14	1	1	1	1	0	0	0	0	0	1	0	0	1	3	2	3	0	0	0	0	0	1	0	0	0	1	3	2	3	0	0	0	0	0	1	0	0
2012-11-22	3	2	1	2	99	3	2	21	21	0	1	3	1	1	1	1	1	1	0	0	0	1	0	0	3	3	3	2	2	2	0	0	0	2	0	0	0	3	3	3	2	2	2	0	0	0	2	0	0
2013-05-10	1	1	1	1	99	2	2	8	8	0	1	2	1	1	0	1	0	1	1	0	1	1	0	0	3	3	0	3	2	0	2	0	99	3	0	0	0	3	3	0	3	2	0	2	0	99	3	0	0
2012-02-28	2	1	1	2	99	3	2	67	67	0	1	3	1	1	0	1	0	0	1	0	1	0	0	0	3	3	0	3	0	0	3	0	99	0	0	0	0	3	3	0	3	0	0	3	0	99	0	0	0
2012-06-15	10	2	1	0.25	30	1	1	17	17	14	1	10	1	0	1	1	0	0	0	0	0	1	1	0	1	0	2	2	0	0	0	0	0	2	0	1	0	1	0	2	2	0	0	0	0	0	2	0	1
2012-02-14	2	2	1	1	99	2	2	6	5	1	99	99	1	1	0	1	0	0	0	0	0	0	0	0	1	1	0	1	0	0	0	0	0	0	0	0	0	1	1	0	1	0	0	0	0	0	0	0	0
2012-11-01	1	1	1	0.5	99	1	1	11	11	0	1	4	1	0	0	1	0	1	1	0	0	0	0	0	1	0	0	3	2	0	1	0	0	0	0	0	0	1	0	0	3	2	0	1	0	0	0	0	0
2013-05-16	2	1	1	0.5	99	1	1	28	28	0	1	2	1	1	1	1	0	1	1	1	1	1	0	0	1	2	2	3	2	0	2	1	99	1	0	0	0	1	2	2	3	2	0	2	1	99	1	0	0
2012-06-21	4	1	1	2	99	3	2	19	19	0	1	9	0	0	0	1	0	0	0	0	1	0	0	0	0	0	0	1	0	0	0	0	1	0	0	0	0	0	0	0	1	0	0	0	0	1	0	0	0
2012-02-20	4	1	1	0.5	99	1	1	11	11	0	1	4	1	1	0	1	0	1	0	0	1	1	0	0	3	3	0	3	3	0	0	0	99	3	0	0	0	3	3	0	3	3	0	0	0	99	3	0	0
2003-05-11	2	2	1	1	99	2	2	9	9	0	1	4	1	1	0	1	0	0	0	0	0	0	0	0	3	2	0	2	0	0	0	0	0	0	0	0	0	3	2	0	2	0	0	0	0	0	0	0	0
2012-03-04	7	2	1	0.25	10	1	1	12	12	0	1	25	0	0	0	0	0	1	0	0	0	1	0	0	0	0	0	0	1	0	0	0	0	1	0	0	0	0	0	0	0	1	0	0	0	0	1	0	0
2013-05-14	3	2	1	2	99	3	2	13	12	1	1	13	1	1	1	1	0	1	1	1	0	0	0	0	3	3	3	3	2	0	3	3	0	0	0	0	0	3	3	3	3	2	0	3	3	0	0	0	0
2012-06-19	99	1	1	0.25	4	1	1	33	33	0	1	8	0	0	0	1	0	0	0	0	0	0	0	0	0	0	0	2	0	0	0	0	0	0	0	0	0	0	0	0	2	0	0	0	0	0	0	0	0
2012-06-21	19	1	1	2	99	3	2	54	54	0	1	15	1	1	1	1	0	1	1	1	1	1	1	0	3	2	2	3	3	0	3	3	99	2	0	2	0	3	2	2	3	3	0	3	3	99	2	0	2
2012-06-18	9	1	1	0.25	20	1	1	28	27	1	1	3	0	0	0	0	0	0	1	1	0	0	1	0	0	0	0	0	0	0	3	1	0	0	0	2	0	0	0	0	0	0	0	3	1	0	0	0	2
2013-05-14	99	1	1	0.25	5	1	1	9	9	0	1	15	0	0	0	0	0	0	1	0	0	0	1	0	0	0	0	0	0	0	1	0	0	0	0	2	0	0	0	0	0	0	0	1	0	0	0	0	2
2012-11-24	2	1	1	0.25	30	1	1	17	17	0	1	7	1	1	1	1	1	1	1	0	0	0	1	0	1	3	3	2	1	1	2	0	0	0	0	1	0	1	3	3	2	1	1	2	0	0	0	0	1
2012-02-15	1	2	1	1	99	2	2	68	68	0	1	7	0	0	1	0	0	0	0	0	1	0	0	0	0	0	2	0	0	0	0	0	99	0	0	0	0	0	0	2	0	0	0	0	0	99	0	0	0
2012-02-13	3	1	1	0.5	99	1	1	14	14	0	1	8	1	1	0	1	1	1	0	0	1	1	0	0	3	3	0	2	2	1	0	0	99	2	0	0	0	3	3	0	2	2	1	0	0	99	2	0	0
2012-06-19	3	2	1	0.25	3	1	1	29	31	0	1	2	1	0	1	1	0	0	0	1	1	0	0	0	3	0	3	1	0	0	0	3	99	0	1	0	0	3	0	3	1	0	0	0	3	99	0	1	0
2012-11-23	1	1	1	0.25	33	1	1	29	29	0	1	5	1	1	0	0	0	0	0	0	0	1	0	0	1	3	0	0	0	0	0	0	0	1	0	0	0	1	3	0	0	0	0	0	0	0	1	0	0
2013-05-14	0	1	1	0.25	3	1	1	7	7	0	1	15	0	0	0	0	0	0	0	0	0	0	0	0	0	0	0	0	0	0	0	0	0	0	0	0	0	0	0	0	0	0	0	0	0	0	0	0	0
2012-11-22	4	2	1	2	99	3	2	21	21	0	1	20	1	0	0	1	1	0	0	0	1	0	0	0	3	0	0	3	0	1	0	0	99	0	0	0	0	3	0	0	3	0	1	0	0	99	0	0	0
2013-05-11	3	2	1	0.5	99	1	1	30	30	0	1	22	1	1	1	1	0	0	1	0	1	1	0	0	1	3	3	3	0	0	2	0	99	3	0	0	0	1	3	3	3	0	0	2	0	99	3	0	0
2012-06-15	1	1	1	0.5	99	1	1	12	12	0	1	20	0	0	0	0	0	0	0	0	0	0	1	0	0	0	0	0	0	0	0	0	0	0	0	1	0	0	0	0	0	0	0	0	0	0	0	0	1
2013-05-16	2	1	1	1	99	2	2	7	7	0	0	0	1	1	1	1	1	1	0	0	0	0	0	0	1	2	2	1	3	2	0	0	0	0	0	0	0	1	2	2	1	3	2	0	0	0	0	0	0
2012-11-23	5	2	1	0.25	20	1	1	73	71	2	1	4	0	1	0	1	0	0	0	0	1	0	0	0	0	1	0	2	0	0	0	0	99	0	0	0	0	0	1	0	2	0	0	0	0	99	0	0	0
2012-03-01	3	2	1	0.5	99	1	1	17	16	1	1	7	1	1	0	1	0	0	0	0	1	1	0	1	3	3	0	2	0	0	0	0	99	1	0	0	1	3	3	0	2	0	0	0	0	99	1	0	0
2012-12-01	3	2	1	0.25	15	1	1	42	42	0	1	50	1	1	1	1	0	0	1	0	1	0	0	1	3	1	2	3	0	0	1	0	99	0	0	0	1	3	1	2	3	0	0	1	0	99	0	0	0
2012-06-15	14	2	1	2	99	3	2	19	19	0	1	4	1	1	1	1	0	1	0	0	1	1	1	1	3	3	3	3	3	0	0	0	99	3	0	3	1	3	3	3	3	3	0	0	0	99	3	0	3
2012-02-26	5	2	1	0.5	99	1	1	17	16	1	1	10	1	1	0	1	0	0	0	0	1	1	1	1	1	3	0	3	0	0	0	0	99	3	0	2	1	1	3	0	3	0	0	0	0	99	3	0	2
2012-11-22	3	2	1	1	99	2	2	49	49	0	1	14	1	1	1	1	0	1	1	0	1	0	0	1	1	3	3	2	2	0	1	0	99	0	0	0	1	1	3	3	2	2	0	1	0	99	0	0	0
2012-02-17	2	2	1	0.25	30	1	1	41	40	1	0	0	1	1	0	1	0	1	0	1	1	0	0	1	3	3	0	1	2	0	0	1	99	0	0	0	1	3	3	0	1	2	0	0	1	99	0	0	0
2013-06-06	6	2	1	0.5	99	1	1	62	99	99	1	13	0	1	0	1	0	0	0	0	1	1	0	1	0	1	0	1	0	0	0	0	99	2	0	0	1	0	1	0	1	0	0	0	0	99	2	0	0
2013-03-16	3	1	1	0.25	30	1	1	55	55	0	1	16	0	1	1	1	0	0	0	0	1	0	1	1	0	3	3	3	0	0	0	0	99	0	0	2	1	0	3	3	3	0	0	0	0	99	0	0	2
2012-06-21	3	1	1	0.5	99	1	1	42	42	0	1	3	1	1	1	1	0	0	1	0	1	1	0	1	3	1	2	2	0	0	1	0	99	1	0	0	1	3	1	2	2	0	0	1	0	99	1	0	0
2012-06-20	7	2	1	1	99	2	2	26	26	0	1	10	1	1	1	1	0	1	0	0	1	1	1	1	1	1	3	1	1	0	0	0	99	3	0	3	1	1	1	3	1	1	0	0	0	99	3	0	3
2013-05-16	2	1	1	1	99	2	2	11	11	0	1	10	1	1	0	1	1	1	1	0	0	0	0	1	3	2	0	2	3	2	3	0	0	0	0	0	1	3	2	0	2	3	2	3	0	0	0	0	0
2013-05-16	3	1	1	0.5	99	1	1	14	14	0	1	13	1	1	1	1	0	0	0	0	0	1	0	1	1	2	2	2	0	0	0	0	0	2	0	0	1	1	2	2	2	0	0	0	0	0	2	0	0
2012-11-22	2	1	1	0.5	99	1	1	20	20	0	1	11	0	1	0	1	0	1	0	0	0	1	0	1	0	2	0	2	2	0	0	0	0	1	0	0	2	0	2	0	2	2	0	0	0	0	1	0	0
2012-11-23	1	1	1	0.25	15	1	1	13	13	0	1	20	1	1	0	1	1	1	1	0	1	1	1	1	1	1	0	3	2	2	3	0	99	3	0	2	2	1	1	0	3	2	2	3	0	99	3	0	2
2012-03-24	7	2	1	0.25	5	1	1	19	19	0	1	6	1	1	0	1	0	0	1	1	0	0	1	1	1	3	0	2	0	0	3	2	0	0	0	3	2	1	3	0	2	0	0	3	2	0	0	0	3
2012-03-04	2	2	1	0.25	30	1	1	28	28	0	1	2	1	1	0	1	0	0	0	0	1	0	0	1	1	2	0	2	0	0	0	0	99	0	0	0	2	1	2	0	2	0	0	0	0	99	0	0	0
2012-02-25	2	2	1	0.5	99	1	1	18	18	0	1	15	1	0	0	1	1	1	0	0	0	1	1	1	1	0	0	1	1	1	0	0	0	2	0	1	2	1	0	0	1	1	1	0	0	0	2	0	1
2012-11-25	5	1	1	0.5	99	1	1	29	29	0	1	20	1	0	1	1	0	0	0	0	1	1	1	1	1	0	2	2	0	0	0	0	99	1	0	3	2	1	0	2	2	0	0	0	0	99	1	0	3
2012-02-27	5	2	1	1	99	2	2	32	32	0	1	1	1	1	1	1	0	0	1	0	1	0	0	1	3	3	3	3	0	0	2	0	99	0	0	0	2	3	3	3	3	0	0	2	0	99	0	0	0
2012-03-01	6	2	1	0.5	99	1	1	16	16	0	1	1	1	1	1	1	0	0	0	0	1	0	0	1	3	3	3	1	0	0	0	0	99	0	0	0	2	3	3	3	1	0	0	0	0	99	0	0	0
2012-06-21	5	2	1	0.5	99	1	1	49	49	0	1	10	1	1	1	1	0	0	0	0	1	0	1	1	3	2	2	2	0	0	0	0	99	0	0	1	2	3	2	2	2	0	0	0	0	99	0	0	1
2012-11-25	2	2	1	1	99	2	2	37	37	0	1	36	1	1	1	1	0	1	1	0	1	1	0	1	1	2	2	3	2	0	2	0	99	3	0	0	2	1	2	2	3	2	0	2	0	99	3	0	0
2012-02-15	5	2	1	0.5	99	1	1	17	17	0	1	27	1	1	1	1	0	0	0	0	1	1	0	1	3	2	2	3	0	0	0	0	99	2	0	0	2	3	2	2	3	0	0	0	0	99	2	0	0
2012-06-23	8	1	1	0.5	99	1	1	36	36	0	1	3	1	1	1	1	0	1	0	0	1	1	0	1	1	2	3	3	1	0	0	0	99	2	0	0	2	1	2	3	3	1	0	0	0	99	2	0	0
2012-03-04	3	2	1	0.25	15	1	1	14	14	0	1	16	1	1	1	1	0	0	1	0	0	1	1	1	3	3	1	2	0	0	2	0	0	2	0	2	2	3	3	1	2	0	0	2	0	0	2	0	2
2012-06-22	5	1	1	0.25	20	1	1	49	49	0	1	1	1	1	1	1	0	0	0	0	1	0	0	1	3	1	2	2	0	0	0	0	99	0	0	0	2	3	1	2	2	0	0	0	0	99	0	0	0
2013-05-11	2	2	1	0.5	99	1	1	28	27	1	1	10	0	0	1	1	0	0	0	0	0	1	0	1	0	0	1	1	0	0	0	0	0	1	0	0	2	0	0	1	1	0	0	0	0	0	1	0	0
2013-05-09	4	1	1	0.25	20	1	1	25	25	0	1	30	0	0	0	1	0	1	0	0	0	0	0	1	0	0	0	2	3	0	0	0	0	0	0	0	2	0	0	0	2	3	0	0	0	0	0	0	0
2013-05-09	3	2	1	1	99	2	2	10	9	1	0	0	1	1	1	1	1	1	1	0	1	1	0	1	3	2	3	3	3	3	3	0	99	3	0	0	2	3	2	3	3	3	3	3	0	99	3	0	0
2013-05-29	4	1	1	1	99	2	2	54	99	99	1	2	1	1	1	0	0	0	0	0	1	0	0	1	1	3	3	0	0	0	0	0	99	0	1	0	2	1	3	3	0	0	0	0	0	99	0	1	0
2013-05-14	7	1	1	0.25	10	1	1	24	24	0	1	2	0	0	1	0	0	0	0	0	1	0	0	1	0	0	3	0	0	0	0	0	99	0	0	0	2	0	0	3	0	0	0	0	0	99	0	0	0
2012-12-01	2	2	1	2	99	3	2	39	39	0	1	50	1	1	1	1	0	0	1	1	1	1	0	1	3	3	2	3	0	0	2	1	99	2	0	0	2	3	3	2	3	0	0	2	1	99	2	0	0
2012-02-13	7	1	1	0.25	5	1	1	65	65	0	1	8	1	1	1	1	1	1	0	0	1	1	0	1	3	3	3	1	3	2	0	0	99	2	0	0	2	3	3	3	1	3	2	0	0	99	2	0	0
2012-11-24	4	1	1	0.25	30	1	1	43	43	0	1	2	1	1	1	1	1	1	1	0	1	1	1	1	3	3	3	3	2	2	2	0	99	2	0	1	2	3	3	3	3	2	2	2	0	99	2	0	1
2013-05-17	2	2	1	0.25	15	1	1	18	18	0	1	7	1	1	1	1	1	1	0	0	1	0	0	1	3	3	2	3	3	3	0	0	99	0	0	0	2	3	3	2	3	3	3	0	0	99	0	0	0
2013-05-16	6	1	1	0.25	30	1	1	24	20	4	0	0	1	1	1	1	0	1	0	0	1	1	0	1	3	3	3	3	2	0	0	0	99	1	0	0	2	3	3	3	3	2	0	0	0	99	1	0	0
2012-11-22	3	2	1	2	99	3	2	54	54	0	1	11	1	0	0	1	0	0	0	0	1	0	0	1	1	0	0	3	0	0	0	0	99	0	0	0	3	1	0	0	3	0	0	0	0	99	0	0	0
2012-02-16	2	1	1	2	99	3	2	26	26	0	1	20	1	1	1	1	0	0	0	0	1	1	0	1	3	3	1	3	0	0	0	0	99	3	0	0	3	3	3	1	3	0	0	0	0	99	3	0	0
2012-11-23	4	2	1	0.25	5	1	1	21	21	0	1	3	1	1	1	1	1	1	1	0	0	0	0	1	1	2	3	3	1	1	1	0	0	0	0	0	3	1	2	3	3	1	1	1	0	0	0	0	0
2012-03-03	6	1	1	2	99	3	2	21	20	1	1	3	1	1	0	0	0	1	1	0	0	1	0	1	1	2	0	0	1	0	3	0	0	2	0	0	3	1	2	0	0	1	0	3	0	0	2	0	0
2013-05-16	3	2	1	1	99	2	2	34	15	19	1	3	1	1	1	1	0	0	0	0	1	1	0	1	3	3	3	3	0	0	0	0	99	2	0	0	3	3	3	3	3	0	0	0	0	99	2	0	0
2013-05-16	3	2	1	1	99	2	2	33	33	0	1	15	1	1	0	1	0	0	1	0	1	0	0	1	3	3	0	3	0	0	3	0	99	0	0	0	3	3	3	0	3	0	0	3	0	99	0	0	0
2013-05-12	5	2	1	1	99	2	2	33	33	0	1	6	1	1	1	1	0	1	1	0	1	1	0	1	3	3	1	2	1	0	3	0	99	3	0	0	3	3	3	1	2	1	0	3	0	99	3	0	0
2012-02-27	2	2	1	0.25	15	1	1	28	28	0	1	10	1	0	1	1	0	1	1	1	1	0	0	1	3	0	3	3	2	0	3	2	99	0	0	0	3	3	0	3	3	2	0	3	2	99	0	0	0
2012-06-23	4	2	1	0.5	99	1	1	19	19	0	1	10	1	1	0	1	0	1	0	0	1	1	1	1	3	3	0	2	2	0	0	0	99	3	0	2	3	3	3	0	2	2	0	0	0	99	3	0	2
2012-02-26	5	1	1	0.5	99	1	1	45	44	1	1	10	1	1	0	1	0	1	1	0	1	0	0	1	3	2	0	3	1	0	1	0	99	0	0	0	3	3	2	0	3	1	0	1	0	99	0	0	0
2012-06-08	30	2	1	2	99	3	2	21	21	0	1	30	1	1	1	1	0	0	1	0	1	1	1	1	3	3	1	3	0	0	1	0	99	2	0	2	3	3	3	1	3	0	0	1	0	99	2	0	2
2012-06-23	3	2	1	0.5	99	1	1	18	18	0	1	7	1	1	1	1	0	0	0	0	1	1	1	1	1	3	1	3	0	0	0	0	99	2	0	2	3	1	3	1	3	0	0	0	0	99	2	0	2
2013-05-10	4	2	1	0.25	10	1	1	40	40	0	1	12	1	1	1	1	0	0	1	0	1	0	0	1	1	3	3	1	0	0	1	0	99	0	0	0	3	1	3	3	1	0	0	1	0	99	0	0	0
2013-06-06	4	1	1	0.25	20	1	1	62	62	0	1	8	1	1	0	1	0	0	0	0	1	1	0	1	1	2	0	3	0	0	0	0	99	2	0	0	3	1	2	0	3	0	0	0	0	99	2	0	0
2013-05-11	2	2	1	0.5	99	1	1	32	32	0	1	4	1	1	0	1	0	0	0	0	1	0	0	1	3	3	0	3	0	0	0	0	99	0	0	0	3	3	3	0	3	0	0	0	0	99	0	0	0
2012-03-03	8	2	1	2	99	3	2	23	21	2	1	2	1	1	1	1	1	1	0	0	1	0	0	1	3	1	3	3	3	3	0	0	99	0	0	0	3	3	1	3	3	3	3	0	0	99	0	0	0
2012-03-01	2	2	1	0.25	30	1	1	20	12	8	1	8	1	1	0	1	0	0	1	0	1	1	0	1	3	3	0	3	0	0	2	0	99	2	0	0	3	3	3	0	3	0	0	2	0	99	2	0	0
2012-02-22	3	2	1	2	99	3	2	28	26	2	1	7	1	1	0	1	0	1	1	0	1	1	0	1	1	2	0	3	2	0	2	0	99	2	0	0	3	1	2	0	3	2	0	2	0	99	2	0	0
2013-05-16	4	2	1	0.25	20	1	1	18	18	0	1	8	1	0	1	1	0	0	1	0	1	0	1	1	1	0	2	1	0	0	3	0	99	0	0	1	3	1	0	2	1	0	0	3	0	99	0	0	1
2012-02-26	2	2	1	0.25	30	1	1	43	43	0	1	35	0	1	1	1	0	0	0	0	1	0	0	1	0	2	3	3	0	0	0	0	99	0	0	0	3	0	2	3	3	0	0	0	0	99	0	0	0
2012-02-27	1	2	1	1	99	2	2	25	25	0	1	50	1	1	1	1	0	1	0	0	1	1	0	1	3	3	3	3	1	0	0	0	99	3	0	0	3	3	3	3	3	1	0	0	0	99	3	0	0
2013-05-16	0	1	1	1	99	2	2	41	34	7	1	14	1	1	1	0	0	0	0	0	0	0	0	1	3	2	3	0	0	0	0	0	0	0	0	0	3	3	2	3	0	0	0	0	0	0	0	0	0
2013-05-13	3	1	1	2	99	3	2	29	29	0	1	5	1	1	1	1	0	0	0	0	1	1	0	1	1	2	2	2	0	0	0	0	99	2	0	0	3	1	2	2	2	0	0	0	0	99	2	0	0
2012-03-02	5	2	1	2	99	3	2	29	29	0	1	5	1	1	1	1	1	1	0	1	0	1	1	1	3	1	3	1	2	2	0	3	0	2	1	1	3	3	1	3	1	2	2	0	3	0	2	1	1
2012-03-01	4	1	1	0.25	15	1	1	51	51	0	1	4	1	1	1	1	0	0	0	0	1	0	0	1	3	3	3	2	0	0	0	0	99	0	0	0	3	3	3	3	2	0	0	0	0	99	0	0	0
2013-05-11	3	1	1	1	99	2	2	27	27	0	1	5	1	1	0	1	0	1	1	0	1	1	0	1	1	3	0	2	1	0	1	0	99	1	0	0	3	1	3	0	2	1	0	1	0	99	1	0	0
2013-05-10	5	1	1	0.25	5	1	1	37	37	0	1	20	0	1	0	1	0	0	0	0	1	0	0	1	0	2	0	1	0	0	0	0	99	0	0	0	3	0	2	0	1	0	0	0	0	99	0	0	0
2013-05-10	5	1	1	0.5	99	1	1	44	44	0	1	16	1	1	1	1	0	1	1	0	1	1	1	1	1	1	1	3	3	0	3	0	99	3	0	1	3	1	1	1	3	3	0	3	0	99	3	0	1
2012-06-18	5	1	1	0.25	5	1	1	26	25	1	1	1	1	1	1	1	0	0	0	0	1	0	0	1	3	2	2	3	0	0	0	0	99	0	0	0	3	3	2	2	3	0	0	0	0	99	0	0	0
2012-02-21	7	1	1	1	99	2	2	38	38	0	1	40	1	1	0	0	0	0	0	0	1	1	0	1	3	3	0	0	0	0	0	0	99	3	0	0	3	3	3	0	0	0	0	0	0	99	3	0	0
2013-05-10	99	1	1	0.25	20	1	1	41	41	0	1	29	1	1	0	1	0	1	0	0	1	0	0	1	3	1	0	3	1	0	0	0	99	0	0	0	3	3	1	0	3	1	0	0	0	99	0	0	0
2012-02-24	3	1	1	2	99	3	2	34	34	0	1	1	1	1	1	1	0	0	0	0	1	0	0	1	1	1	1	3	0	0	0	0	99	0	0	0	3	1	1	1	3	0	0	0	0	99	0	0	0
2013-05-09	5	2	1	0.25	5	1	1	45	45	0	1	3	1	1	1	1	0	0	0	0	1	0	0	1	1	3	2	3	0	0	0	0	99	0	0	0	3	1	3	2	3	0	0	0	0	99	0	0	0
2012-11-22	3	2	1	0.5	99	1	1	23	23	0	1	3	1	1	1	1	0	1	1	0	1	1	1	1	3	3	3	3	1	0	1	0	99	3	1	1	3	3	3	3	3	1	0	1	0	99	3	1	1
2013-06-06	1	2	1	0.5	99	1	1	57	57	0	99	99	1	1	1	1	0	0	0	1	1	1	0	1	3	3	3	2	0	0	0	2	99	1	0	0	3	3	3	3	2	0	0	0	2	99	1	0	0
2013-05-11	4	1	1	0.25	5	1	1	23	23	0	1	30	0	0	1	1	0	1	0	0	0	0	0	0	0	0	2	3	2	0	0	0	0	0	0	0	0	0	0	2	3	2	0	0	0	0	0	0	0
2013-05-16	3	2	1	2	99	3	2	16	16	0	1	8	0	1	1	1	0	0	0	0	0	0	0	0	0	2	2	2	0	0	0	0	0	0	0	0	0	0	2	2	2	0	0	0	0	0	0	0	0
2013-05-09	3	2	1	0.25	7	1	1	35	35	0	1	8	1	0	0	0	0	0	0	0	0	0	0	0	1	0	0	0	0	0	0	0	0	0	0	0	0	1	0	0	0	0	0	0	0	0	0	0	0
2012-11-22	1	1	1	0.5	99	1	1	14	14	0	1	9	1	1	0	1	0	1	1	0	1	1	0	1	1	3	0	1	1	0	2	0	99	3	1	0	3	1	3	0	1	1	0	2	0	99	3	1	0
2012-06-19	3	1	1	0.25	30	1	1	42	42	0	1	6	1	1	1	1	0	0	0	0	1	0	0	0	3	3	2	2	0	0	0	0	99	0	0	0	0	3	3	2	2	0	0	0	0	99	0	0	0
2012-11-22	99	2	1	2	99	3	2	12	12	0	1	5	1	0	0	0	0	0	0	0	0	0	0	0	1	0	0	0	0	0	0	0	0	0	0	0	0	1	0	0	0	0	0	0	0	0	0	0	0
2012-02-25	3	2	1	2	99	3	2	33	32	1	1	100	1	0	1	1	0	0	0	0	0	1	0	1	1	0	1	1	0	0	0	0	0	1	0	0	1	1	0	1	1	0	0	0	0	0	1	0	0
2013-06-07	2	2	1	0.5	99	1	1	23	14	9	1	10	1	1	0	1	0	0	1	0	1	1	0	1	1	2	0	2	0	0	2	0	99	2	0	0	2	1	2	0	2	0	0	2	0	99	2	0	0
2012-02-14	1	1	1	0.25	30	1	1	14	13	1	1	15	0	0	1	1	0	1	0	0	0	0	0	1	0	0	2	2	2	0	0	0	0	0	0	0	2	0	0	2	2	2	0	0	0	0	0	0	0
2012-02-21	99	1	1	2	99	3	2	29	29	0	1	40	1	1	1	1	0	0	0	0	1	1	1	1	3	3	3	3	0	0	0	0	99	3	1	3	3	3	3	3	3	0	0	0	0	99	3	1	3
2012-03-03	2	1	1	0.25	15	1	1	17	17	0	1	2	1	1	1	1	0	0	1	0	1	1	0	1	3	3	3	1	0	0	2	0	99	3	0	0	3	3	3	3	1	0	0	2	0	99	3	0	0
2013-05-27	10	1	1	2	99	3	2	27	27	0	1	4	1	1	1	1	1	1	0	0	1	1	0	1	1	2	1	2	2	1	0	0	99	3	1	0	3	1	2	1	2	2	1	0	0	99	3	1	0
2013-06-06	4	1	1	0.25	5	1	1	44	44	0	1	3	1	1	0	1	0	1	1	0	0	1	1	1	3	3	0	2	2	0	2	0	0	2	0	2	3	3	3	0	2	2	0	2	0	0	2	0	2
2013-05-14	4	2	1	0.25	10	1	1	16	13	3	1	6	1	1	1	1	0	1	1	0	0	0	0	1	3	3	3	3	1	0	1	0	0	0	0	0	3	3	3	3	3	1	0	1	0	0	0	0	0
2012-02-16	8	2	2	1	99	2	2	15	15	0	1	3	1	1	1	0	0	0	0	0	0	1	1	0	3	3	3	0	0	0	0	0	0	2	0	3	0	3	3	3	0	0	0	0	0	0	2	0	3
2012-02-18	99	1	2	0.25	99	1	1	29	28	1	1	10	0	0	0	0	0	0	0	0	0	0	0	0	0	0	0	0	0	0	0	0	0	0	0	0	0	0	0	0	0	0	0	0	0	0	0	0	0
2012-06-14	99	2	2	0.5	99	1	1	93	93	0	99	99	0	0	0	0	0	0	1	0	1	1	0	1	0	0	0	0	0	0	2	0	99	2	0	0	2	0	0	0	0	0	0	2	0	99	2	0	0
2012-02-22	6	2	2	0.25	5	1	1	52	52	0	1	50	1	1	0	1	0	0	0	0	1	0	1	1	1	1	0	3	0	0	0	0	99	0	0	1	3	1	1	0	3	0	0	0	0	99	0	0	1
2012-11-21	15	2	2	0.25	25	1	1	35	35	0	1	20	0	0	0	1	0	0	0	0	1	0	0	0	0	0	0	1	0	0	0	0	99	0	0	0	0	0	0	0	1	0	0	0	0	99	0	0	0
2012-02-17	6	2	2	0.25	20	1	1	68	68	0	99	99	1	1	1	1	0	1	0	0	1	1	0	1	3	3	2	3	3	0	0	0	99	2	0	0	3	3	3	2	3	3	0	0	0	99	2	0	0
2012-11-23	6	1	2	0.25	20	1	1	25	25	0	1	14	1	1	0	1	0	0	1	0	1	1	0	0	1	1	0	3	0	0	1	0	99	2	0	0	0	1	1	0	3	0	0	1	0	99	2	0	0
2013-05-10	2	2	2	0.25	30	1	1	13	13	0	1	30	1	1	0	1	0	0	1	0	0	1	0	0	1	3	0	2	0	0	2	0	0	1	0	0	0	1	3	0	2	0	0	2	0	0	1	0	0
2013-06-16	99	1	2	0.25	1	1	1	16	14	2	99	99	0	0	0	0	0	0	0	0	0	0	0	0	0	0	0	0	0	0	0	0	0	0	0	0	0	0	0	0	0	0	0	0	0	0	0	0	0
2012-11-21	4	2	2	0.25	25	1	1	28	28	0	1	4	0	1	0	1	0	0	0	0	0	1	0	0	0	1	0	2	0	0	0	0	0	2	0	0	0	0	1	0	2	0	0	0	0	0	2	0	0
2012-11-24	1	1	2	0.25	25	1	1	37	36	1	1	2	0	1	0	1	0	1	1	1	0	0	0	0	0	1	0	2	1	0	1	1	0	0	0	0	0	0	1	0	2	1	0	1	1	0	0	0	0
2012-11-21	2	2	2	0.5	99	1	1	36	34	2	1	10	1	0	0	1	0	0	1	0	1	0	0	0	1	0	0	2	0	0	3	0	99	0	0	0	0	1	0	0	2	0	0	3	0	99	0	0	0
2012-11-23	2	2	2	0.25	35	1	1	14	14	0	1	5	0	1	1	1	0	0	0	0	0	0	1	0	0	3	1	2	0	0	0	0	0	0	0	1	0	0	3	1	2	0	0	0	0	0	0	0	1
2012-11-24	2	2	2	0.5	25	1	1	27	99	99	1	2	0	1	1	1	0	0	0	0	1	0	0	1	0	1	1	2	0	0	0	0	99	0	0	0	1	0	1	1	2	0	0	0	0	99	0	0	0
2012-11-22	1	2	2	0.5	99	1	1	25	25	0	1	1	0	0	0	1	0	0	0	0	1	0	0	1	0	0	0	1	0	0	0	0	99	0	0	0	1	0	0	0	1	0	0	0	0	99	0	0	0
2012-02-16	3	2	2	0.5	99	1	1	16	15	1	1	4	1	1	1	1	1	1	0	1	1	1	1	1	3	3	2	2	2	2	0	2	99	2	0	1	1	3	3	2	2	2	2	0	2	99	2	0	1
2012-11-22	4	2	2	1	99	2	2	13	13	0	1	6	1	1	1	1	0	0	1	0	1	1	0	1	1	1	2	2	0	0	1	0	99	3	0	0	1	1	1	2	2	0	0	1	0	99	3	0	0
2012-11-23	3	1	2	0.25	15	1	1	39	39	0	1	8	1	0	1	1	0	1	0	0	0	0	0	1	1	0	1	1	1	0	0	0	0	0	0	0	1	1	0	1	1	1	0	0	0	0	0	0	0
2012-03-01	13	1	2	0.25	2	1	1	14	12	2	1	20	1	1	1	1	0	1	1	0	1	1	0	1	3	3	2	2	3	0	3	0	99	1	0	0	2	3	3	2	2	3	0	3	0	99	1	0	0
2012-11-22	4	1	2	2	99	3	2	36	36	0	1	6	1	1	1	1	0	0	0	1	0	1	0	1	1	2	3	2	0	0	0	3	0	1	0	0	2	1	2	3	2	0	0	0	3	0	1	0	0
2012-02-26	5	2	2	2	99	3	2	15	15	0	1	20	1	0	0	1	0	1	0	0	1	1	0	1	3	0	0	2	3	0	0	0	99	1	0	0	2	3	0	0	2	3	0	0	0	99	1	0	0
2012-02-17	5	2	2	2	99	3	2	32	32	0	1	2	0	0	1	1	0	0	0	0	0	0	0	1	0	0	3	1	0	0	0	0	0	0	0	0	2	0	0	3	1	0	0	0	0	0	0	0	0
2012-11-22	2	1	2	2	99	3	2	89	81	8	1	3	1	1	1	1	0	1	1	0	1	1	1	1	1	1	1	3	3	0	2	0	99	3	0	2	2	1	1	1	3	3	0	2	0	99	3	0	2
2012-12-01	99	2	2	0.5	99	1	1	54	54	0	1	1	1	1	1	0	0	1	0	0	1	1	0	1	1	3	2	0	1	0	0	0	99	2	0	0	2	1	3	2	0	1	0	0	0	99	2	0	0
2012-11-24	5	1	2	0.5	99	1	1	17	17	0	1	1	1	1	1	1	0	1	1	0	1	1	0	1	3	3	3	3	2	0	2	0	99	2	0	0	2	3	3	3	3	2	0	2	0	99	2	0	0
2012-06-20	7	1	2	0.5	99	1	1	67	67	0	1	1	1	1	1	1	0	0	0	0	1	1	0	1	3	3	2	3	0	0	0	0	99	1	0	0	3	3	3	2	3	0	0	0	0	99	1	0	0
2012-02-16	8	2	2	0.5	99	1	1	37	37	0	1	12	1	1	1	1	0	1	1	1	1	1	1	1	3	3	3	3	3	0	3	3	99	2	0	1	3	3	3	3	3	3	0	3	3	99	2	0	1
2012-02-23	7	1	2	0.25	5	1	1	16	16	0	1	20	1	1	1	1	1	1	1	0	1	1	0	1	1	1	3	1	2	1	3	0	99	1	0	0	3	1	1	3	1	2	1	3	0	99	1	0	0
2012-02-21	7	2	2	1	99	2	2	38	38	0	1	50	1	1	0	1	1	1	0	0	1	1	1	1	3	2	0	3	3	3	0	0	99	2	0	2	3	3	2	0	3	3	3	0	0	99	2	0	2
2013-05-11	3	1	2	0.5	99	1	1	50	50	0	1	25	1	1	0	1	0	0	1	1	1	1	1	1	1	1	0	1	0	0	2	3	99	3	0	2	3	1	1	0	1	0	0	2	3	99	3	0	2
2012-02-16	1	2	2	2	99	3	2	37	37	0	1	6	1	1	1	1	1	1	1	1	1	1	0	1	3	3	3	2	3	3	2	1	99	2	1	0	3	3	3	3	2	3	3	2	1	99	2	1	0
2012-02-23	5	2	2	0.25	20	1	1	26	26	0	1	6	1	1	0	1	1	1	0	0	1	0	0	1	3	2	0	3	2	1	0	0	99	0	0	0	3	3	2	0	3	2	1	0	0	99	0	0	0
2012-02-18	2	1	2	0.5	99	1	1	36	35	1	1	4	1	1	1	1	0	1	0	0	1	1	0	1	3	2	3	3	1	0	0	0	99	2	0	0	3	3	2	3	3	1	0	0	0	99	2	0	0
2012-02-24	12	1	2	3	99	3	2	16	16	0	1	1	1	1	1	1	1	1	1	0	1	1	1	1	3	3	3	3	3	3	1	0	99	3	3	1	3	3	3	3	3	3	3	1	0	99	3	3	1
2012-11-30	29	1	3	2	99	3	2	14	14	0	1	10	1	0	1	1	1	1	0	0	0	1	0	1	1	0	1	2	1	1	0	0	0	2	0	0	3	1	0	1	2	1	1	0	0	0	2	0	0
2012-03-04	4	1	3	2	99	3	2	15	14	1	1	10	1	1	1	1	0	0	0	0	0	1	0	1	1	2	1	2	0	0	0	0	0	1	0	0	1	1	2	1	2	0	0	0	0	0	1	0	0
[truncated: 24 more columns]

## Sheet: variable name
name	label	type
DATENTR		Date
DIASSINT	days of symptoms	Numeric
SEXO	gender	String	1=female	2 = male
resGE1fin	type of malaria	String	1=vivax	2=falciparum	3 = FV
cruz1final	parasitemia	Numeric
forma1fin	forma final	String
clasParPositivos	parasitemia positivos	String
ReclasParAdPos	reclass parasitemia Ad positivos	String	1 = "<= 0.5 +"	2 = ">=1+"
idade	idade	Numeric
tempoam	tempo na Amazonia	Numeric
idExpMaAd	idade inicio exposicao malaria Adulto	Numeric
malant	ja teve malaria antes?	String	0= no	1= yes
quantmal	quantas malarias antes referidas	Numeric
FEV	febre	String	0= no	1= yes
CHI	calafrio	String	0= no	1= yes
SWE	sudorese	String	0= no	1= yes
HEA	cefaleia	String	0= no	1= yes
VOM	vomitos	String	0= no	1= yes
NAU	nausea	String	0= no	1= yes
ABD	dor abdominal	String	0= no	1= yes
DIA	diarreia	String	0= no	1= yes
ART	artralgia	String	0= no	1= yes
DIZ	vertigem	String	0= no	1= yes
COU	tosse	String	0= no	1= yes
MYA	mialgia e lombalgia juntas	String	0= no	1= yes
intFEB	intensid febre	String	0 = absent	1=mild	2 = moderate	3=severe
intCAL	intensid CALAF	String	0 = absent	1=mild	2 = moderate	3=severe
intSUD	intensid sudorese	String	0 = absent	1=mild	2 = moderate	3=severe
intCEF	intensid cefaleia	String	0 = absent	1=mild	2 = moderate	3=severe
intNAU	intensid nauseas	String	0 = absent	1=mild	2 = moderate	3=severe
intVOM	intensid vomitos	String	0 = absent	1=mild	2 = moderate	3=severe
intDOR	intensid dor abdominal	String	0 = absent	1=mild	2 = moderate	3=severe
intDIA	intensid diarreia	String	0 = absent	1=mild	2 = moderate	3=severe
intART	intensid artralgia	String	0 = absent	1=mild	2 = moderate	3=severe
intTONT	intensid tontura	String	0 = absent	1=mild	2 = moderate	3=severe
intDISP	intensid dispneia	String	0 = absent	1=mild	2 = moderate	3=severe
intTOS	intensid tosse	String	0 = absent	1=mild	2 = moderate	3=severe
intMIALOMB	intensid mialgialombalgia	String	0 = absent	1=mild	2 = moderate	3=severe
intFEB3	intensid febre	Numeric	0 = absent	1=mild	2 = moderate	3=severe
intCAL3	intensid CALAF	Numeric	0 = absent	1=mild	2 = moderate	3=severe
intSUD3	intensid sudorese	Numeric	0 = absent	1=mild	2 = moderate	3=severe
intCEF3	intensid cefaleia	Numeric	0 = absent	1=mild	2 = moderate	3=severe
intNAU3	intensid nauseas	Numeric	0 = absent	1=mild	2 = moderate	3=severe
intVOM3	intensid vomitos	Numeric	0 = absent	1=mild	2 = moderate	3=severe
intDOR3	intensid dor abdominal	Numeric	0 = absent	1=mild	2 = moderate	3=severe
intDIA3	intensid diarreia	Numeric	0 = absent	1=mild	2 = moderate	3=severe
intART3	intensid artralgia	Numeric	0 = absent	1=mild	2 = moderate	3=severe
intTONT3	intensid tontura	Numeric	0 = absent	1=mild	2 = moderate	3=severe
intDISP3	intensid dispneia	Numeric	0 = absent	1=mild	2 = moderate	3=severe
intTOS3	intensid tosse	Numeric	0 = absent	1=mild	2 = moderate	3=severe
intMIALOMB3	intensid mialgialombalgia	Numeric	0 = absent	1=mild	2 = moderate	3=severe
internac	internacao durante episodio	String	0 = no	1=yes
INA	teve falta de apetite	Numeric	0 = no	1=yes
COR	teve coriza	Numeric	0 = no	1=yes
SNE	teve espirro	Numeric	0 = no	1=yes
SOR	teve dor em orofaringe	Numeric	0 = no	1=yes
PAL	teve palidez	Numeric	0 = no	1=yes
WEA	teve fraqueza	Numeric	0 = no	1=yes
BIT	teve boca amarga	Numeric	0 = no	1=yes
in_d_olhos	intensidade da dor retroorbicular	Numeric	0 = absent	1=mild	2 = moderate	3=severe
in_apet	intensidade da perda de apetite	Numeric	0 = absent	1=mild	2 = moderate	3=severe
in_cor	intensidade da coriza	Numeric	0 = absent	1=mild	2 = moderate	3=severe
in_esp	intensidade dos espirros	Numeric	0 = absent	1=mild	2 = moderate	3=severe
in_garg	intensidade da irritacao ou coceira na garganta	Numeric	0 = absent	1=mild	2 = moderate	3=severe
in_pali	intensidade da palidez	Numeric	0 = absent	1=mild	2 = moderate	3=severe
in_fra	intensidade da fraqueza	Numeric	0 = absent	1=mild	2 = moderate	3=severe
in_boc	intensidade da boca amarga	Numeric	0 = absent	1=mild	2 = moderate	3=severe
in_icte	intensidade da icteria	Numeric	0 = absent	1=mild	2 = moderate	3=severe
outro	outro sintoma	String
GRUPO_FEBR_ALG	grupo febre e algicos	Numeric	0=absent	1=present
GRUP_GASTRICOS	grupo gastrico	Numeric	0=absent	1=present
GRUP_FLUELIKE	grupo respiratorios	Numeric	0=absent	1=present
GRUPO_VOMIT	grupo vomitos e palidez	Numeric	0=absent	1=present
catdiasint	days of syptom	String	1 = "1 to 3"	2 = "4 or more"
